# Supplementary material for: Physicians’ Perspectives on HL7 Information Policy Sensitive Value Set: A Validation Study through Health Concept Categorization
Source: Healthcare (Basel). 2023 Oct 28;11(21):2845. doi: 10.3390/healthcare11212845 (PMC10647660; doi:10.3390/healthcare11212845)
Supplement: Supplementary file 1 [file healthcare-11-02845-s001.zip]

Archive with 4 entries (4 files):
- Supplementary S1.xlsx
- Supplementary S2.pdf
- Supplementary S3.xlsx
- Supplementary S4.pdf
