# Supplementary material for: Physicians’ Perspectives on HL7 Information Policy Sensitive Value Set: A Validation Study through Health Concept Categorization
Source: Healthcare (Basel). 2023 Oct 28;11(21):2845. doi: 10.3390/healthcare11212845 (PMC10647660; doi:10.3390/healthcare11212845)
Supplement: Supplementary file 1 [file healthcare-11-02845-s001.zip › Supplementary S1.xlsx]

## Sheet: Sheet1
Terminology	Code	Health Data Item
https://github.com/synthetichealth/synthea	555-448-3555	(Phone) value
http://www.nlm.nih.gov/research/umls/rxnorm	1000126	1 ML medroxyprogesterone acetate 150 MG/ML Injection
http://www.nlm.nih.gov/research/umls/rxnorm	1808217	100 ML Propofol 10 MG/ML Injection
http://www.nlm.nih.gov/research/umls/rxnorm	1534809	168 HR Ethinyl Estradiol 0.00146 MG/HR / norelgestromin 0.00625 MG/HR Transdermal System
http://snomed.info/sct	132281000119108	Acute deep venous thrombosis (disorder)
http://snomed.info/sct	33879002	Administration of vaccine to produce active immunity (procedure)
http://snomed.info/sct	305336008	Admission to hospice (procedure)
http://snomed.info/sct	305428000	Admission to orthopedic department
http://snomed.info/sct	449411000124106	Admission to skilled nursing facility (procedure)
http://loinc.org	1742-6	Alanine aminotransferase [Enzymatic activity/volume] in Serum or Plasma
http://loinc.org	1751-7	Albumin [Mass/volume] in Serum or Plasma
http://www.nlm.nih.gov/research/umls/rxnorm	630208	albuterol 0.83 MG/ML Inhalation Solution
http://loinc.org	72109-2	Alcohol Use Disorder Identification Test - Consumption [AUDIT-C]
http://snomed.info/sct	226138001	Alcohol-free diet
http://snomed.info/sct	7200002	Alcoholism
http://snomed.info/sct	21626009	Allergic skin rash
http://www.nlm.nih.gov/research/umls/rxnorm	308136	amLODIPine 2.5 MG Oral Tablet
http://www.nlm.nih.gov/research/umls/rxnorm	562251	Amoxicillin 250 MG / Clavulanate 125 MG Oral Tablet
http://snomed.info/sct	39579001	Anaphylaxis (disorder)
http://snomed.info/sct	271737000	Anemia (disorder)
http://snomed.info/sct	264287008	Animal dander (allergy substance)
http://snomed.info/sct	135892000	Antenatal education
http://snomed.info/sct	169673001	Antenatal RhD antibody screening
http://snomed.info/sct	713076009	Antenatal risk assessment
http://loinc.org	5767-09-01	Appearance of Urine
http://www.nlm.nih.gov/research/umls/rxnorm	243670	Aspirin 81 MG Oral Tablet
http://snomed.info/sct	428211000124100	Assessment of substance use (procedure)
http://www.nlm.nih.gov/research/umls/rxnorm	197378	Astemizole 10 MG Oral Tablet
http://snomed.info/sct	394701000	Asthma follow-up
http://snomed.info/sct	171231001	Asthma screening
http://snomed.info/sct	225158009	Auscultation of the fetal heart
http://loinc.org	57023-4	Auto Differential panel - Blood
http://loinc.org	706-2	Basophils/100 leukocytes in Blood by Automated count
http://snomed.info/sct	439830001	Behavior to prevent infection
http://loinc.org	1960-04-01	Bicarbonate [Moles/volume] in Arterial blood
http://loinc.org	5770-03-01	Bilirubin.total [Presence] in Urine by Test strip
http://snomed.info/sct	35999006	Blighted ovum
http://snomed.info/sct	337414009	Blood glucose meter (physical object)
http://loinc.org	85354-9	Blood Pressure
http://loinc.org	8302-02-01	Body Height
http://loinc.org	29463-7	Body Weight
http://snomed.info/sct	229298005	Breathing control
http://loinc.org	1988-05-01	C reactive protein [Mass/volume] in Serum or Plasma
http://loinc.org	49765-1	Calcium
http://loinc.org	2027-01-01	Carbon dioxide, total [Moles/volume] in Venous blood
http://loinc.org	69453-9	Cause of Death [US Standard Certificate of Death]
http://snomed.info/sct	367336001	Chemotherapy (procedure)
http://loinc.org	2075-0	Chloride [Moles/volume] in Serum or Plasma
http://snomed.info/sct	431855005	Chronic kidney disease stage 1 (disorder)
http://snomed.info/sct	1121000119107	Chronic neck pain (finding)
http://snomed.info/sct	40055000	Chronic sinusitis (disorder)
http://loinc.org	32167-9	Clarity of Urine
http://snomed.info/sct	168594001	Clavicle X-ray
http://snomed.info/sct	359817006	Closed fracture of hip
http://snomed.info/sct	418891003	Computed tomography of chest and abdomen
http://snomed.info/sct	232717009	Coronary artery bypass grafting (procedure)
http://snomed.info/sct	413473000	Counseling about alcohol consumption
http://loinc.org	2160-0	Creatinine [Mass/volume] in Serum or Plasma
http://snomed.info/sct	38822007	Cystitis
http://snomed.info/sct	90226004	Cytopathology procedure, preparation of smear, genital source
http://snomed.info/sct	16983000	Death in hospital (event)
http://snomed.info/sct	171207006	Depression screening (procedure)
http://snomed.info/sct	62315008	Diarrhea (finding)
http://snomed.info/sct	1151000175103	Dietary approaches to stop hypertension diet
http://snomed.info/sct	410006001	Digital examination of rectum
http://dicom.nema.org/medical/dicom/current/output/chtml/part16/sect_CID_29.html	DX	Digital Radiography
http://snomed.info/sct	210098006	Domiciliary or rest home patient evaluation and management
http://snomed.info/sct	385949008	Dressing change management
http://terminology.hl7.org/CodeSystem/v2-0203	DL	Driver's License
http://snomed.info/sct	266707007	Drug addiction therapy
http://snomed.info/sct	55680006	Drug overdose
http://snomed.info/sct	56876005	Drug rehabilitation and detoxification
http://hl7.org/fhir/sid/cvx	20	DTaP
http://snomed.info/sct	185345009	Encounter for symptom
urn:ietf:bcp:47	en-US	English (what is your communication language?)
http://snomed.info/sct	85548006	Episiotomy
http://www.nlm.nih.gov/research/umls/rxnorm	831533	Errin 28 Day Pack
http://snomed.info/sct	271807003	Eruption of skin (disorder)
http://loinc.org	33914-3	Estimated Glomerular Filtration Rate
http://loinc.org	48065-7	Fibrin D-dimer FEU [Mass/volume] in Platelet poor plasma
http://snomed.info/sct	203082005	Fibromyalgia (disorder)
http://snomed.info/sct	300359004	Finding of vomiting (finding)
http://snomed.info/sct	390906007	Follow-up encounter (procedure)
http://snomed.info/sct	160903007	Full-time employment (finding)
http://loinc.org	10834-0	Globulin [Mass/volume] in Serum by calculation
http://loinc.org	2345-07-01	Glucose [Mass/volume] in Serum or Plasma
http://loinc.org	25428-4	Glucose [Presence] in Urine by Test strip
http://snomed.info/sct	165829005	Gonorrhea infection test
http://loinc.org	9843-04-01	Head Occipital-frontal circumference
http://loinc.org	20570-8	Hematocrit [Volume Fraction] of Blood
http://snomed.info/sct	104091002	Hemoglobin / Hematocrit / Platelet count
http://loinc.org	57905-2	Hemoglobin.gastrointestinal [Presence] in Stool by Immunologic method
http://hl7.org/fhir/sid/cvx	52	Hep A, adult
http://hl7.org/fhir/sid/cvx	83	Hep A, ped/adol, 2 dose
http://hl7.org/fhir/sid/cvx	49	Hib (PRP-OMP)
http://snomed.info/sct	708409001	Home nebulizer therapy
http://www.nlm.nih.gov/research/umls/rxnorm	310798	Hydrochlorothiazide 25 MG Oral Tablet
http://snomed.info/sct	55822004	Hyperlipidemia
http://snomed.info/sct	390906007	Hypertension follow-up encounter
http://www.nlm.nih.gov/research/umls/rxnorm	310965	Ibuprofen 200 MG Oral Tablet
http://snomed.info/sct	196416002	Impacted molars
http://loinc.org	80382-5	Influenza virus A Ag [Presence] in Nasopharynx by Rapid immunoassay
http://loinc.org	80381-7	Influenza virus A and B Ag panel - Nasopharynx by Rapid immunoassay
http://loinc.org	92141-1	Influenza virus B RNA [Presence] in Respiratory specimen by NAA with probe detection
http://snomed.info/sct	65200003	Insertion of intrauterine contraceptive device
http://snomed.info/sct	169553002	Insertion of subcutaneous contraceptive
http://hl7.org/fhir/sid/cvx	10	IPV
http://snomed.info/sct	414545008	Ischemic heart disease (disorder)
http://www.nlm.nih.gov/research/umls/rxnorm	542347	Isoflurane 999 MG/ML Inhalant Solution
http://snomed.info/sct	57676002	Joint pain (finding)
http://loinc.org	10230-1	Left ventricular Ejection fraction
http://loinc.org	6690-02-01	Leukocytes [#/volume] in Blood by Automated count
http://www.nlm.nih.gov/research/umls/rxnorm	199885	levofloxacin 500 MG Oral Tablet
http://www.nlm.nih.gov/research/umls/rxnorm	314076	lisinopril 10 MG Oral Tablet
http://www.nlm.nih.gov/research/umls/rxnorm	979485	losartan potassium 25 MG Oral Tablet
http://snomed.info/sct	36955009	Loss of taste (finding)
http://loinc.org	18262-6	Low Density Lipoprotein Cholesterol
http://loinc.org	736-9	Lymphocytes/100 leukocytes in Blood by Automated count
http://snomed.info/sct	698354004	Magnetic resonance imaging for measurement of brain volume (procedure)
http://loinc.org	786-4	MCHC [Mass/volume] by Automated count
http://snomed.info/sct	430193006	Medication Reconciliation (procedure)
http://hl7.org/fhir/sid/cvx	114	meningococcal MCV4P
http://snomed.info/sct	237602007	Metabolic syndrome X (disorder)
http://snomed.info/sct	361055000	Misuses drugs (finding)
http://loinc.org	742-7	Monocytes [#/volume] in Blood by Automated count
http://loinc.org	5905-05-01	Monocytes/100 leukocytes in Blood by Automated count
http://loinc.org	751-8	Neutrophils [#/volume] in Blood by Automated count
http://loinc.org	5802-04-01	Nitrite [Presence] in Urine by Test strip
http://snomed.info/sct	424132000	Non-small cell carcinoma of lung, TNM stage 1 (disorder)
urn:oid:2.16.840.1.113883.6.238	2186-05-01	Not Hispanic or Latino (Ethnicity)
http://snomed.info/sct	709138001	Notification of treatment plan (procedure)
http://snomed.info/sct	224295006	Only received primary school education (finding)
http://snomed.info/sct	239873007	Osteoarthritis of knee
http://snomed.info/sct	64859006	Osteoporosis (disorder)
http://snomed.info/sct	371908008	Oxygen administration by mask (procedure)
http://loinc.org	2708-06-01	Oxygen saturation in Arterial blood
http://www.nlm.nih.gov/research/umls/rxnorm	583214	PACLitaxel 100 MG Injection
http://loinc.org	91148-7	Pain intensity, Enjoyment of life, General activity (PEG) 3 item pain scale
http://loinc.org	LA30138-4	Part-time or temporary work
http://snomed.info/sct	43075005	Partial resection of colon
http://snomed.info/sct	308335008	Patient encounter procedure
http://www.nlm.nih.gov/research/umls/rxnorm	834102	Penicillin V Potassium 500 MG Oral Tablet
http://loinc.org	5803-02-01	pH of Urine by Test strip
http://loinc.org	2746-06-01	pH of Venous blood
http://snomed.info/sct	91251008	Physical therapy procedure (regime/therapy)
http://loinc.org	777-3	Platelets [#/volume] in Blood by Automated count
http://hl7.org/fhir/sid/cvx	133	Pneumococcal conjugate PCV 13
http://hl7.org/fhir/sid/cvx	33	pneumococcal polysaccharide vaccine, 23 valent
http://loinc.org	33756-8	Polyp size greatest dimension by CAP cancer protocols
http://snomed.info/sct	701100002	Polysomnography analyzer (physical object)
http://hl7.org/fhir/StructureDefinition/geolocation	84119	postalCode
http://snomed.info/sct	243063003	Postoperative procedure education (procedure)
http://snomed.info/sct	223495004	Preparation of patient for procedure (regime/therapy)
http://snomed.info/sct	409023009	Professional / ancillary services care (regime/therapy)
http://loinc.org	2857-1	Prostate specific Ag [Mass/volume] in Serum or Plasma
http://snomed.info/sct	90470006	Prostatectomy
http://loinc.org	5804-0	Protein [Mass/volume] in Urine by Test strip
http://loinc.org	5902-02-01	Prothrombin time (PT)
http://snomed.info/sct	65677008	Pulmonary catheterization with Swan-Ganz catheter (procedure)
http://snomed.info/sct	87433001	Pulmonary emphysema (disorder)
http://snomed.info/sct	224299000	Received higher education (finding)
http://snomed.info/sct	446654005	Refugee (person)
http://www.nlm.nih.gov/research/umls/rxnorm	1729584	remifentanil 2 MG Injection
http://snomed.info/sct	878820003	Rhinoconjunctivitis (disorder)
http://snomed.info/sct	169690007	Rubella screening
http://terminology.hl7.org/CodeSystem/v3-MaritalStatus	S	S (marital status)
http://hl7.org/fhir/sid/cvx	208	SARS-COV-2 (COVID-19) vaccine, mRNA, spike protein, LNP, preservative free, 30 mcg/0.3mL dose
http://snomed.info/sct	410538000	Scheduling (procedure)
http://snomed.info/sct	713106006	Screening for drug abuse (procedure)
http://snomed.info/sct	104435004	Screening for occult blood in feces (procedure)
http://www.nlm.nih.gov/research/umls/rxnorm	749762	Seasonique 91 Day Pack
http://snomed.info/sct	80583007	Severe anxiety (panic) (finding)
http://snomed.info/sct	735029006	Shellfish (allergy substance)
http://www.nlm.nih.gov/research/umls/rxnorm	312961	Simvastatin 20 MG Oral Tablet
http://snomed.info/sct	36971009	Sinusitis (disorder)
http://snomed.info/sct	225323000	Smoking cessation education
http://snomed.info/sct	422650009	Social isolation (finding)
http://terminology.hl7.org/CodeSystem/v2-0203	SS	Social Security Number
http://snomed.info/sct	269911007	Sputum examination (procedure)
http://snomed.info/sct	248595008	Sputum finding (finding)
http://hl7.org/fhir/StructureDefinition/geolocation	UT	state (address)
http://snomed.info/sct	118001005	Streptococcus pneumoniae group B antigen test
http://loinc.org	93038-8	Stress is when someone feels tense, nervous, anxious or can't sleep at night because their mind is troubled. How stressed are you?
http://snomed.info/sct	180256009	Subcutaneous immunotherapy
http://snomed.info/sct	288086009	Suture open wound
http://loinc.org	8480-06-01	Systolic Blood Pressure
http://snomed.info/sct	117015009	Throat culture (procedure)
http://loinc.org	3016-03-01	Thyrotropin [Units/volume] in Serum or Plasma
http://snomed.info/sct	71493000	Transfusion of packed red blood cells (procedure)
http://www.nlm.nih.gov/research/umls/rxnorm	751905	Trinessa 28 Day Pack
http://snomed.info/sct	1225002	Upper arm X-ray
http://loinc.org	6299-02-01	Urea Nitrogen
http://snomed.info/sct	702927004	Urgent care clinic (procedure)
http://snomed.info/sct	268556000	Urine screening for glucose
http://loinc.org	46288-7	US Guidance for biopsy of Prostate
http://snomed.info/sct	444814009	Viral sinusitis (disorder)
http://www.nlm.nih.gov/research/umls/rxnorm	2001499	Vitamin B 12 5 MG/ML Injectable Solution
http://snomed.info/sct	249497008	Vomiting symptom (finding)
http://snomed.info/sct	302761001	Walking exercise test (procedure)
http://snomed.info/sct	410620009	Well child visit (procedure)
http://www.nlm.nih.gov/research/umls/rxnorm	866412	24 HR metoprolol succinate 100 MG Extended Release Oral Tablet
http://www.nlm.nih.gov/research/umls/rxnorm	1796676	25 ML protamine sulfate (USP) 10 MG/ML Injection
http://www.nlm.nih.gov/research/umls/rxnorm	896209	60 ACTUAT Fluticasone propionate 0.25 MG/ACTUAT / salmeterol 0.05 MG/ACTUAT Dry Powder Inhaler
http://snomed.info/sct	274531002	Abnormal findings diagnostic imaging heart+coronary circulat (finding)
http://www.nlm.nih.gov/research/umls/rxnorm	209387	Acetaminophen 325 MG Oral Tablet [Tylenol]
http://loinc.org	3184-09-01	Activated clotting time (ACT) of Blood by Coagulation assay
http://snomed.info/sct	91861009	Acute myeloid leukemia, disease (disorder)
http://snomed.info/sct	401314000	Acute non-ST segment elevation myocardial infarction (disorder)
http://snomed.info/sct	65710008	Acute respiratory failure (disorder)
http://snomed.info/sct	195662009	Acute viral pharyngitis (disorder)
http://snomed.info/sct	410770002	Administration of anesthesia for procedure (procedure)
http://snomed.info/sct	305408004	Admission to surgical department
http://snomed.info/sct	409524006	Airborne precautions (procedure)
http://snomed.info/sct	170838006	Allergic disorder follow-up assessment
http://snomed.info/sct	170837001	Allergic disorder initial assessment
http://snomed.info/sct	58332002	Allergy education
http://snomed.info/sct	395142003	Allergy screening test
http://snomed.info/sct	312404004	Antenatal blood tests
http://loinc.org	3173-02-01	aPTT in Blood by Coagulation assay
http://loinc.org	1920-08-01	Aspartate aminotransferase [Enzymatic activity/volume] in Serum or Plasma
http://snomed.info/sct	710824005	Assessment of health and social care needs (procedure)
http://snomed.info/sct	762993000	Assessment using Morse Fall Scale (procedure)
http://snomed.info/sct	195967001	Asthma
http://www.nlm.nih.gov/research/umls/rxnorm	617311	atorvastatin 40 MG Oral Tablet
http://loinc.org	51990-0	Basic Metabolic Panel
http://loinc.org	704-7	Basophils [#/volume] in Blood by Automated count
http://loinc.org	1975-02-01	Bilirubin.total [Mass/volume] in Serum or Plasma
https://github.com/synthetichealth/synthea	17-04-1925	birthDate
http://loinc.org	59576-9	Body mass index (BMI) [Percentile] Per age and gender
http://snomed.info/sct	162864005	Body mass index 30+ - obesity (finding)
http://loinc.org	8310-05-01	Body temperature
http://www.nlm.nih.gov/research/umls/rxnorm	351109	budesonide 0.25 MG/ML Inhalation Suspension
http://loinc.org	17861-6	Calcium [Mass/volume] in Serum or Plasma
http://snomed.info/sct	42825003	Cannulation (procedure)
http://loinc.org	2019-08-01	Carbon dioxide [Partial pressure] in Arterial blood
http://loinc.org	2028-09-01	Carbon dioxide, total [Moles/volume] in Serum or Plasma
http://snomed.info/sct	92691004	Carcinoma in situ of prostate (disorder)
http://snomed.info/sct	66348005	Childbirth
http://snomed.info/sct	233678006	Childhood asthma
http://snomed.info/sct	124171000119105	Chronic intractable migraine without aura
http://snomed.info/sct	278860009	Chronic low back pain (finding)
http://snomed.info/sct	185086009	Chronic obstructive bronchitis (disorder)
http://www.nlm.nih.gov/research/umls/rxnorm	1736854	Cisplatin 50 MG Injection
http://hl7.org/fhir/StructureDefinition/geolocation	Salt Lake City	city
http://snomed.info/sct	228557008	Cognitive and behavioral therapy (regime/therapy)
http://snomed.info/sct	73761001	Colonoscopy
http://snomed.info/sct	703423002	Combined chemotherapy and radiation therapy (procedure)
http://loinc.org	24323-8	Comprehensive metabolic 2000 panel - Serum or Plasma
http://snomed.info/sct	62564004	Concussion with loss of consciousness
http://snomed.info/sct	33367005	Coronary angiography (procedure)
http://snomed.info/sct	409063005	Counseling
http://loinc.org	38483-4	Creatinine
http://snomed.info/sct	371605008	Deep breathing and coughing exercises
http://snomed.info/sct	171207006	Depression screening
http://snomed.info/sct	44054006	Diabetes
http://snomed.info/sct	173160006	Diagnostic fiberoptic bronchoscopy (procedure)
http://snomed.info/sct	306706006	Discharge to ward (procedure)
http://snomed.info/sct	23745001	Documentation procedure (procedure)
http://loinc.org	82666-9	Drug Abuse Screening Test-10 [DAST-10]
http://snomed.info/sct	60112009	Drug addiction counseling
http://loinc.org	65750-2	Drugs of abuse 5 panel - Urine by Screen method
http://snomed.info/sct	102263004	Eggs (edible) (allergy substance)
http://terminology.hl7.org/CodeSystem/condition-category	encounter-diagnosis	Encounter Diagnosis
http://snomed.info/sct	185349003	Encounter for check up (procedure)
http://snomed.info/sct	185347001	Encounter for problem
http://snomed.info/sct	185345009	Encounter for symptom (procedure)
http://snomed.info/sct	183452005	Encounter Inpatient
http://loinc.org	713-8	Eosinophils/100 leukocytes in Blood by Automated count
http://snomed.info/sct	18946005	Epidural anesthesia
http://loinc.org	788-0	Erythrocyte distribution width [Ratio] by Automated count
http://loinc.org	789-8	Erythrocytes [#/volume] in Blood by Automated count
http://www.nlm.nih.gov/research/umls/rxnorm	389221	Etonogestrel 68 MG Drug Implant
http://loinc.org	51847-2	Evaluation + Plan note
http://snomed.info/sct	8517006	Ex-smoker (finding)
http://snomed.info/sct	229065009	Exercise therapy
http://loinc.org	59460-6	Fall risk total [Morse Fall Scale]
http://snomed.info/sct	84229001	Fatigue (finding)
http://snomed.info/sct	409089005	Febrile neutropenia (disorder)
http://snomed.info/sct	271442007	Fetal anatomy study
http://snomed.info/sct	156073000	Fetus with unknown complication
http://snomed.info/sct	58150001	Fracture of clavicle
http://snomed.info/sct	65966004	Fracture of forearm
http://loinc.org	24336-0	Gas panel - Arterial blood
http://loinc.org	24339-4	Gas panel - Venous blood
http://snomed.info/sct	162673000	General examination of patient (procedure)
http://loinc.org	69737-5	Generalized anxiety disorder 7 item (GAD-7)
http://loinc.org	5792-07-01	Glucose [Mass/volume] in Urine by Test strip
http://snomed.info/sct	266948004	Has a criminal record (finding)
http://loinc.org	8289-01-01	Head Occipital-frontal circumference Percentile
http://snomed.info/sct	223366009	Healthcare professional (occupation)
http://loinc.org	55405-5	Heartfailure Tracking Panel
http://loinc.org	718-7	Hemoglobin [Mass/volume] in Blood
http://loinc.org	5794-03-01	Hemoglobin [Presence] in Urine by Test strip
http://loinc.org	4548-04-01	Hemoglobin A1c/Hemoglobin.total in Blood
http://hl7.org/fhir/sid/cvx	43	Hep B, adult
http://snomed.info/sct	47758006	Hepatitis B Surface Antigen Measurement
http://snomed.info/sct	104375008	Hepatitis C antibody test
http://loinc.org	2085-09-01	High Density Lipoprotein Cholesterol
http://loinc.org	LA30192-1	High school diploma or GED
http://snomed.info/sct	63332003	History AND physical examination (procedure)
http://snomed.info/sct	399211009	History of myocardial infarction (situation)
http://snomed.info/sct	385763009	Hospice care (regime/therapy)
http://snomed.info/sct	32485007	Hospital admission (procedure)
http://snomed.info/sct	31676001	Human immunodeficiency virus antigen test
http://loinc.org	76499-3	Humiliation, Afraid, Rape, and Kick questionnaire [HARK]
http://snomed.info/sct	59621000	Hypertension
http://snomed.info/sct	389087006	Hypoxemia (disorder)
http://snomed.info/sct	8290005	Induced cardioplegia (procedure)
http://loinc.org	92142-9	Influenza virus A RNA [Presence] in Respiratory specimen by NAA with probe detection
http://snomed.info/sct	710818004	Inhaled steroid therapy
http://loinc.org	6301-06-01	INR in Platelet poor plasma by Coagulation assay
http://snomed.info/sct	392247006	Insertion of catheter into artery (procedure)
http://snomed.info/sct	76601001	Intramuscular injection
http://loinc.org	75689-0	Iron panel - Serum or Plasma
http://snomed.info/sct	444908001	Isolation nursing in negative pressure isolation environment (regime/therapy)
http://snomed.info/sct	361235007	Isolation of infected patient (procedure)
http://www.nlm.nih.gov/research/umls/rxnorm	757594	Jolivette 28 Day Pack
http://snomed.info/sct	284551006	Laceration of foot
http://snomed.info/sct	283385000	Laceration of thigh
http://loinc.org	14804-9	Lactate dehydrogenase [Enzymatic activity/volume] in Serum or Plasma by Lactate to pyruvate reaction
http://www.nlm.nih.gov/research/umls/rxnorm	748879	Levora 0.15/30 28 Day Pack
http://snomed.info/sct	423315002	Limited social contact (finding)
http://www.nlm.nih.gov/research/umls/rxnorm	665078	Loratadine 5 MG Chewable Tablet
http://loinc.org	731-0	Lymphocytes [#/volume] in Blood by Automated count
http://terminology.hl7.org/CodeSystem/v3-MaritalStatus	M	M (marital status)
http://terminology.hl7.org/CodeSystem/v2-0203	MR	Medical Record Number
http://www.nlm.nih.gov/research/umls/rxnorm	866924	metoprolol tartrate 25 MG Oral Tablet
http://loinc.org	14959-1	Microalbumin Creatinine Ratio
http://snomed.info/sct	19169002	Miscarriage in first trimester
http://loinc.org	59453-1	Morse Fall Scale panel
http://www.nlm.nih.gov/research/umls/rxnorm	849574	Naproxen sodium 220 MG Oral Tablet
http://www.nlm.nih.gov/research/umls/rxnorm	978950	Natazia 28 Day Pack
http://snomed.info/sct	126906006	Neoplasm of prostate
http://loinc.org	770-8	Neutrophils/100 leukocytes in Blood by Automated count
http://snomed.info/sct	266919005	Never smoked tobacco (finding)
http://snomed.info/sct	254637007	Non-small cell lung cancer (disorder)
http://snomed.info/sct	72892002	Normal pregnancy
http://loinc.org	8331-01-01	Oral temperature
http://snomed.info/sct	371883000	Outpatient procedure
http://loinc.org	2705-02-01	Oxygen [Partial pressure] in Venous blood
http://loinc.org	19994-3	Oxygen/Inspired gas setting [Volume Fraction] Ventilator
http://loinc.org	92140-3	Parainfluenza virus 1 RNA [Presence] in Respiratory specimen by NAA with probe detection
http://loinc.org	92139-5	Parainfluenza virus 2 RNA [Presence] in Respiratory specimen by NAA with probe detection
http://terminology.hl7.org/CodeSystem/v2-0203	PPN	Passport Number
http://snomed.info/sct	443165006	Pathological fracture due to osteoporosis (disorder)
http://snomed.info/sct	58000006	Patient discharge (procedure)
http://snomed.info/sct	397821002	Patient transfer to intensive care unit (procedure)
http://snomed.info/sct	232353008	Perennial allergic rhinitis with seasonal variation
http://snomed.info/sct	14768001	Peripheral blood smear interpretation
http://snomed.info/sct	408580007	Physical activity target light exercise
http://snomed.info/sct	5880005	Physical examination following birth
http://snomed.info/sct	68496003	Polyp of colon
http://loinc.org	2823-03-01	Potassium [Moles/volume] in Serum or Plasma
http://www.nlm.nih.gov/research/umls/rxnorm	855812	prasugrel 10 MG Oral Tablet
http://snomed.info/sct	15777000	Prediabetes
http://loinc.org	2885-02-01	Protein [Mass/volume] in Serum or Plasma
http://snomed.info/sct	405783006	Psychological assessment
http://snomed.info/sct	5251000175109	Received certificate of high school equivalency (finding)
http://snomed.info/sct	243077000	Recommendation to limit sexual activity
http://snomed.info/sct	713197008	Recurrent rectal polyp
http://snomed.info/sct	183519002	Referral to cardiology service (procedure)
http://snomed.info/sct	698560000	Referral to sleep apnea clinic (procedure)
http://snomed.info/sct	301884003	Removal of aortic cross clamp (procedure)
http://snomed.info/sct	271280005	Removal of endotracheal tube (procedure)
http://snomed.info/sct	301807007	Removal of subcutaneous contraceptive
http://snomed.info/sct	46706006	Replacement of contraceptive intrauterine device
http://snomed.info/sct	424393004	Reports of violence in the environment (finding)
http://snomed.info/sct	701077002	Respiratory apnea monitoring system (physical object)
http://loinc.org	9279-01-01	Respiratory rate
http://snomed.info/sct	229586001	Rest, ice, compression and elevation treatment programme
http://snomed.info/sct	415300000	Review of systems (procedure)
http://snomed.info/sct	443529005	Screening for chromosomal aneuploidy in prenatal amniotic fluid
http://snomed.info/sct	28163009	Skin test for tuberculosis
http://snomed.info/sct	103750000	Sleep apnea assessment (procedure)
http://loinc.org	2947-0	Sodium (laboratory test)
urn:ietf:bcp:47	es	Spanish (what is your communication language?)
http://snomed.info/sct	311555007	Speech and language therapy regime (regime/therapy)
http://snomed.info/sct	44465007	Sprain of ankle
http://snomed.info/sct	252482003	Stair-climbing test (procedure)
http://snomed.info/sct	252160004	Standard pregnancy test
http://snomed.info/sct	43878008	Streptococcal sore throat (disorder)
http://snomed.info/sct	73595000	Stress (finding)
http://snomed.info/sct	840544004	Suspected COVID-19
http://www.nlm.nih.gov/research/umls/rxnorm	141918	Terfenadine 60 MG Oral Tablet
http://loinc.org	72166-2	Tobacco smoking status
http://snomed.info/sct	116861002	Transfusion of fresh frozen plasma (procedure)
http://snomed.info/sct	442571000124108	Tree nut (allergy substance)
http://snomed.info/sct	782576004	Tree pollen (allergy substance)
http://loinc.org	2571-08-01	Triglycerides (laboratory test)
http://loinc.org	89579-7	Troponin I.cardiac [Mass/volume] in Serum or Plasma by High sensitivity method
http://loinc.org	69409-1	U.S. standard certificate of death - 2003 revision
http://snomed.info/sct	10939881000119105	Unhealthy alcohol drinking behavior (finding)
http://loinc.org	3094-0	Urea nitrogen [Mass/volume] in Serum or Plasma
http://loinc.org	24357-6	Urinalysis macro (dipstick) panel - Urine
http://snomed.info/sct	395123002	Urine screening test for diabetes
http://loinc.org	77606-2	Weight-for-length Per age and sex
http://snomed.info/sct	412071004	Wheat (allergy substance)
http://snomed.info/sct	56018004	Wheezing (finding)
http://snomed.info/sct	247472004	Wheal (finding)
http://hl7.org/fhir/sid/cvx	121	zoster
	NO_INSURANCE	(insurance) coverage
http://www.nlm.nih.gov/research/umls/rxnorm	752899	0.25 ML Leuprolide Acetate 30 MG/ML Prefilled Syringe
http://www.nlm.nih.gov/research/umls/rxnorm	854235	0.4 ML Enoxaparin sodium 100 MG/ML Prefilled Syringe
http://www.nlm.nih.gov/research/umls/rxnorm	1860480	1 ML DOCEtaxel 20 MG/ML Injection
http://www.nlm.nih.gov/research/umls/rxnorm	1659263	1 ML heparin sodium, porcine 5000 UNT/ML Injection
http://www.nlm.nih.gov/research/umls/rxnorm	895996	120 ACTUAT fluticasone propionate 0.044 MG/ACTUAT Metered Dose Inhaler [Flovent]
http://www.nlm.nih.gov/research/umls/rxnorm	1536148	120 ACTUAT mometasone furoate 0.2 MG/ACTUAT Metered Dose Inhaler [Asmanex]
http://www.nlm.nih.gov/research/umls/rxnorm	1740467	2 ML Ondansetron 2 MG/ML Injection
http://www.nlm.nih.gov/research/umls/rxnorm	313820	Acetaminophen 160 MG Chewable Tablet
http://www.nlm.nih.gov/research/umls/rxnorm	1043400	Acetaminophen 21.7 MG/ML / Dextromethorphan Hydrobromide 1 MG/ML / doxylamine succinate 0.417 MG/ML Oral Solution
http://www.nlm.nih.gov/research/umls/rxnorm	1049625	Acetaminophen 325 MG / Oxycodone Hydrochloride 10 MG Oral Tablet [Percocet]
http://www.nlm.nih.gov/research/umls/rxnorm	313782	Acetaminophen 325 MG Oral Tablet
http://snomed.info/sct	75498004	Acute bacterial sinusitis (disorder)
http://snomed.info/sct	10509002	Acute bronchitis (disorder)
http://loinc.org	94040-3	Adenovirus A+B+C+D+E DNA [Presence] in Respiratory specimen by NAA with probe detection
http://snomed.info/sct	305342007	Admission to ward (procedure)
http://loinc.org	6768-06-01	Alkaline phosphatase [Enzymatic activity/volume] in Serum or Plasma
http://snomed.info/sct	275833003	Alpha-fetoprotein test
http://www.nlm.nih.gov/research/umls/rxnorm	308192	Amoxicillin 500 MG Oral Tablet
http://snomed.info/sct	386516004	Anticipatory guidance (procedure)
http://snomed.info/sct	272265001	Appliance for sleep apnea (physical object)
http://snomed.info/sct	710841007	Assessment of anxiety (procedure)
http://snomed.info/sct	763302001	Assessment using Alcohol Use Disorders Identification Test - Consumption (procedure)
http://loinc.org	24321-2	Basic Metabolic 2000 Panel
http://snomed.info/sct	288328004	Bee venom (allergy substance)
http://loinc.org	14627-4	Bicarbonate [Moles/volume] in Venous blood
http://snomed.info/sct	287664005	Bilateral tubal ligation
http://snomed.info/sct	65575008	Biopsy of prostate
http://snomed.info/sct	44608003	Blood typing, RH typing
http://loinc.org	39156-5	Body Mass Index
http://snomed.info/sct	274474001	Bone immobilization
http://snomed.info/sct	162676008	Brief general examination (procedure)
http://www.nlm.nih.gov/research/umls/rxnorm	748962	Camila 28 Day Pack
http://loinc.org	2021-04-01	Carbon dioxide [Partial pressure] in Venous blood
http://snomed.info/sct	63697000	Cardiopulmonary bypass operation (procedure)
http://snomed.info/sct	392091000	Care regimes assessment (procedure)
http://www.nlm.nih.gov/research/umls/rxnorm	1665060	cefazolin 2000 MG Injection
http://snomed.info/sct	192127007	Child attention deficit disorder
http://snomed.info/sct	310861008	Chlamydia antigen test
http://snomed.info/sct	433144002	Chronic kidney disease stage 3 (disorder)
http://snomed.info/sct	82423001	Chronic pain
http://www.nlm.nih.gov/research/umls/rxnorm	309362	Clopidogrel 75 MG Oral Tablet
http://loinc.org	5778-06-01	Color of Urine
http://loinc.org	58410-2	Complete blood count (hemogram) panel - Blood by Automated count
http://snomed.info/sct	698314001	Consultation for treatment
http://snomed.info/sct	49727002	Cough (finding)
http://hl7.org/fhir/StructureDefinition/geolocation	US	country (address)
http://snomed.info/sct	840539006	COVID-19
http://loinc.org	2157-06-01	Creatine kinase [Enzymatic activity/volume] in Serum or Plasma
http://snomed.info/sct	715252007	Depression screening using Patient Health Questionnaire Nine Item score (procedure)
http://snomed.info/sct	370789001	Development of individualized plan of care (procedure)
http://snomed.info/sct	160670007	Diabetic diet
http://snomed.info/sct	127013003	Diabetic renal disease (disorder)
http://snomed.info/sct	267060006	Diarrhea symptom (finding)
http://loinc.org	8462-04-01	Diastolic Blood Pressure
http://snomed.info/sct	308283009	Discharge from hospital (procedure)
http://snomed.info/sct	449381000124108	Discharge from skilled nursing facility (procedure)
http://snomed.info/sct	61480009	Drug detoxification
http://snomed.info/sct	267036007	Dyspnea (finding)
http://snomed.info/sct	40701008	Echocardiography (procedure)
http://snomed.info/sct	29303009	Electrocardiographic procedure (procedure)
http://snomed.info/sct	50849002	Emergency Encounter
http://snomed.info/sct	183478001	Emergency hospital admission for asthma
http://snomed.info/sct	50849002	Emergency room admission (procedure)
http://snomed.info/sct	185349003	Encounter for 'check-up'
http://snomed.info/sct	185347001	Encounter for problem (procedure)
http://loinc.org	711-2	Eosinophils [#/volume] in Blood by Automated count
http://loinc.org	21000-5	Erythrocyte distribution width [Entitic volume] by Automated count
http://snomed.info/sct	274804006	Evaluation of uterine fundal height
http://loinc.org	2276-04-01	Ferritin [Mass/volume] in Serum or Plasma
http://www.nlm.nih.gov/research/umls/rxnorm	310325	ferrous sulfate 325 MG Oral Tablet
http://snomed.info/sct	386661006	Fever (finding)
http://snomed.info/sct	735971005	Fish (allergy substance)
http://snomed.info/sct	409002	Food allergy diet
https://github.com/synthetichealth/synthea	male	gender
http://snomed.info/sct	256277009	Grass pollen (allergy substance)
http://snomed.info/sct	370995009	Health risks education (procedure)
http://snomed.info/sct	224891009	Healthcare services (qualifier value)
http://loinc.org	8867-04-01	Heart rate
http://hl7.org/fhir/sid/cvx	8	Hep B, adolescent or pediatric
http://loinc.org	34117-2	History and physical note
http://snomed.info/sct	399261000	History of coronary artery bypass grafting (situation)
http://snomed.info/sct	32911000	Homeless (finding)
http://snomed.info/sct	1505002	Hospital admission for isolation (procedure)
http://snomed.info/sct	105531004	Housing unsatisfactory (finding)
http://hl7.org/fhir/sid/cvx	62	HPV, quadrivalent
http://loinc.org	92134-6	Human metapneumovirus RNA [Presence] in Respiratory specimen by NAA with probe detection
http://snomed.info/sct	302870006	Hypertriglyceridemia (disorder)
http://www.nlm.nih.gov/research/umls/rxnorm	198405	Ibuprofen 100 MG Oral Tablet
http://loinc.org	80383-3	Influenza virus B Ag [Presence] in Nasopharynx by Rapid immunoassay
http://hl7.org/fhir/sid/cvx	140	Influenza, seasonal, injectable, preservative free
http://snomed.info/sct	315639002	Initial patient assessment (procedure)
http://snomed.info/sct	79094001	Initial Psychiatric Interview with mental status evaluation
http://www.nlm.nih.gov/research/umls/rxnorm	106892	insulin human, isophane 70 UNT/ML / Regular Insulin, Human 30 UNT/ML Injectable Suspension [Humulin]
http://snomed.info/sct	52765003	Intubation
http://snomed.info/sct	418290006	Itching (finding)
http://loinc.org	2514-08-01	Ketones [Presence] in Urine by Test strip
http://snomed.info/sct	283371005	Laceration of forearm
http://loinc.org	5799-02-01	Leukocyte esterase [Presence] in Urine by Test strip
http://snomed.info/sct	443402002	Lifestyle education regarding hypertension
http://loinc.org	57698-3	Lipid Panel
http://snomed.info/sct	201834006	Localized, primary osteoarthritis of the hand
http://loinc.org	19123-9	Magnesium [Mass/volume] in Serum or Plasma
http://snomed.info/sct	363406005	Malignant tumor of colon
http://snomed.info/sct	228869008	Manual wheelchair (physical object)
http://loinc.org	785-6	MCH [Entitic mass] by Automated count
http://loinc.org	787-2	MCV [Entitic volume] by Automated count
http://snomed.info/sct	23426006	Measurement of respiratory function (procedure)
http://snomed.info/sct	104326007	Measurement of Varicella-zoster virus antibody
http://snomed.info/sct	359672006	Median sternotomy (procedure)
http://www.nlm.nih.gov/research/umls/rxnorm	861467	Meperidine Hydrochloride 50 MG Oral Tablet
http://snomed.info/sct	90781000119102	Microalbuminuria due to type 2 diabetes mellitus (disorder)
http://www.nlm.nih.gov/research/umls/rxnorm	311700	Midazolam 1 MG/ML Injectable Solution
http://hl7.org/fhir/sid/cvx	3	MMR
http://snomed.info/sct	84489001	Mold (organism)
http://snomed.info/sct	229064008	Movement therapy (regime/therapy)
http://snomed.info/sct	68962001	Muscle pain (finding)
http://snomed.info/sct	112790001	Nasal sinus endoscopy (procedure)
http://snomed.info/sct	422587007	Nausea (finding)
http://www.nlm.nih.gov/research/umls/rxnorm	1870230	NDA020800 0.3 ML Epinephrine 1 MG/ML Auto-Injector
http://www.nlm.nih.gov/research/umls/rxnorm	745752	NDA021457 200 ACTUAT albuterol 0.09 MG/ACTUAT Metered Dose Inhaler [ProAir]
http://snomed.info/sct	368581000119106	Neuropathy due to type 2 diabetes mellitus (disorder)
http://snomed.info/sct	47318007	Neutropenia (disorder)
http://www.nlm.nih.gov/research/umls/rxnorm	311989	Nitrofurantoin 5 MG/ML Oral Suspension
http://www.nlm.nih.gov/research/umls/rxnorm	705129	Nitroglycerin 0.4 MG/ACTUAT Mucosal Spray
http://snomed.info/sct	741062008	Not in labor force (finding)
http://snomed.info/sct	410401003	Nursing care/supplementary surveillance (regime/therapy)
http://snomed.info/sct	183460006	Obstetric emergency hospital admission
http://snomed.info/sct	78275009	Obstructive sleep apnea syndrome (disorder)
http://snomed.info/sct	84478008	Occupational therapy (regime/therapy)
http://loinc.org	X9999-0	Operative Status
http://snomed.info/sct	65363002	Otitis media
http://loinc.org	2703-07-01	Oxygen [Partial pressure] in Arterial blood
http://snomed.info/sct	336621006	Oxygen concentrator (physical object)
http://snomed.info/sct	431069006	Packed red blood cells (product)
http://loinc.org	72514-3	Pain severity - 0-10 verbal numeric rating [Score] - Reported
http://loinc.org	38208-5	Pain severity - Reported
http://loinc.org	92138-7	Parainfluenza virus 3 RNA [Presence] in Respiratory specimen by NAA with probe detection
http://snomed.info/sct	160904001	Part-time employment (finding)
http://snomed.info/sct	308335008	Patient encounter procedure (procedure)
http://snomed.info/sct	268425006	Pelvis X-ray
http://loinc.org	2744-01-01	pH of Arterial blood
http://www.nlm.nih.gov/research/umls/rxnorm	1094107	Phenazopyridine hydrochloride 100 MG Oral Tablet
http://loinc.org	2777-01-01	Phosphate [Mass/volume] in Serum or Plasma
http://loinc.org	44249-1	PHQ-9 quick depression assessment panel [Reported.PHQ]
http://snomed.info/sct	5880005	Physical examination
http://snomed.info/sct	5880005	Physical examination of mother
http://loinc.org	32465-7	Physical findings of Prostate
http://snomed.info/sct	301882004	Placement of aortic cross clamp (procedure)
http://snomed.info/sct	431182000	Placing subject in prone position (procedure)
http://snomed.info/sct	399208008	Plain chest X-ray (procedure)
http://loinc.org	32207-3	Platelet distribution width [Entitic volume] in Blood by Automated count
http://loinc.org	32623-1	Platelet mean volume [Entitic volume] in Blood by Automated count
http://snomed.info/sct	233604007	Pneumonia (disorder)
http://snomed.info/sct	736169004	Post anesthesia care management (procedure)
http://snomed.info/sct	169762003	Postnatal visit
http://snomed.info/sct	225386006	Pre-discharge assessment (procedure)
http://snomed.info/sct	110467000	Pre-surgery testing (procedure)
http://snomed.info/sct	424441002	Prenatal initial visit
http://snomed.info/sct	424619006	Prenatal visit
http://snomed.info/sct	386463000	Prescribed activity/exercise education
http://loinc.org	33959-8	Procalcitonin [Mass/volume] in Serum or Plasma
http://loinc.org	20454-5	Protein [Presence] in Urine by Test strip
http://snomed.info/sct	157141000119108	Proteinuria due to type 2 diabetes mellitus (disorder)
http://loinc.org	34528-0	PT panel - Platelet poor plasma by Coagulation assay
http://snomed.info/sct	15081005	Pulmonary rehabilitation (regime/therapy)
http://snomed.info/sct	304510005	Recommendation to avoid exercise
http://snomed.info/sct	183051005	Recommendation to rest
http://snomed.info/sct	274031008	Rectal polypectomy
http://snomed.info/sct	306185001	Referral to cardiac surgery service (procedure)
http://snomed.info/sct	271825005	Respiratory distress (finding)
http://loinc.org	92143-7	Respiratory pathogens DNA and RNA panel - Respiratory specimen by NAA with probe detection
http://loinc.org	92131-2	Respiratory syncytial virus RNA [Presence] in Respiratory specimen by NAA with probe detection
http://snomed.info/sct	51116004	RhD passive immunization
http://loinc.org	92130-4	Rhinovirus RNA [Presence] in Respiratory specimen by NAA with probe detection
http://snomed.info/sct	160968000	Risk activity involvement (finding)
http://www.nlm.nih.gov/research/umls/rxnorm	1234995	Rocuronium bromide 10 MG/ML Injectable Solution
http://hl7.org/fhir/sid/cvx	119	rotavirus, monovalent
http://hl7.org/fhir/sid/cvx	207	SARS-COV-2 (COVID-19) vaccine, mRNA, spike protein, LNP, preservative free, 100 mcg/0.5mL dose
http://loinc.org	94531-1	SARS-CoV-2 RNA Pnl Resp NAA+probe
http://snomed.info/sct	866148006	Screening for domestic abuse (procedure)
http://www.nlm.nih.gov/research/umls/rxnorm	312938	Sertraline 100 MG Oral Tablet
http://snomed.info/sct	224355006	Served in armed forces (finding)
http://www.nlm.nih.gov/research/umls/rxnorm	314231	Simvastatin 10 MG Oral Tablet
http://snomed.info/sct	82808001	Sleep apnea monitoring with alarm (regime/therapy)
http://snomed.info/sct	39898005	Sleep disorder (disorder)
http://terminology.hl7.org/CodeSystem/observation-category	social-history	social-history
http://loinc.org	2951-02-01	Sodium [Moles/volume] in Serum or Plasma
http://loinc.org	5811-05-01	Specific gravity of Urine by Test strip
http://snomed.info/sct	229070002	Stretching exercises
http://snomed.info/sct	162573006	Suspected lung cancer (situation)
http://snomed.info/sct	269828009	Syphilis infection test
http://hl7.org/fhir/sid/cvx	113	Td (adult) preservative free
http://hl7.org/fhir/sid/cvx	115	Tdap
http://loinc.org	2093-03-01	Total Cholesterol
http://www.nlm.nih.gov/research/umls/rxnorm	835603	tramadol hydrochloride 50 MG Oral Tablet
http://loinc.org	89577-1	Troponin I.cardiac panel - Serum or Plasma by High sensitivity method
http://snomed.info/sct	169230002	Ultrasound scan for fetal viability
http://loinc.org	24356-8	Urinalysis complete panel - Urine
http://snomed.info/sct	117010004	Urine culture
