# Supplementary material for: Physicians’ Perspectives on HL7 Information Policy Sensitive Value Set: A Validation Study through Health Concept Categorization
Source: Healthcare (Basel). 2023 Oct 28;11(21):2845. doi: 10.3390/healthcare11212845 (PMC10647660; doi:10.3390/healthcare11212845)
Supplement: Supplementary file 1 [file healthcare-11-02845-s001.zip › Supplementary S3.xlsx]

## Sheet: Sheet1
NOTE: Green represents agreement, yellow partial agreement and red disagreement.
Phone (value)	Demographics	Demographics
1 ML medroxyprogesterone acetate 150 MG/ML Injection	Medications,Sexual and reproductive health	Medications,Sexual and reproductive health
100 ML Propofol 10 MG/ML Injection	Medications	Medications
168 HR Ethinyl Estradiol 0.00146 MG/HR / norelgestromin 0.00625 MG/HR Transdermal System	Medications,Sexual and reproductive health	Medications,Sexual and reproductive health
Acute deep venous thrombosis (disorder)	Diagnoses	Diagnoses
Alcohol Use Disorder Identification Test - Consumption [AUDIT-C]	Behavioral Health,Diagnoses	Behavioral Health,Diagnoses
Allergic skin rash	Diagnoses	Diagnoses
AmLODIPine 2.5 MG Oral Tablet	Medications	Medications
Amoxicillin 250 MG / Clavulanate 125 MG Oral Tablet	Medications	Medications
Anaphylaxis (disorder)	Diagnoses	Diagnoses
Anemia (disorder)	Diagnoses	Diagnoses
Aspirin 81 MG Oral Tablet	Medications	Medications
Astemizole 10 MG Oral Tablet	Medications	Medications
Asthma screening	Diagnoses	Diagnoses
Breathing control	Other	Other
Chemotherapy (procedure)	Medications	Medications
Chronic kidney disease stage 1 (disorder)	Diagnoses	Diagnoses
Chronic neck pain (finding)	Diagnoses	Diagnoses
Chronic sinusitis (disorder)	Diagnoses	Diagnoses
Cystitis	Diagnoses	Diagnoses
Diarrhea (finding)	Diagnoses	Diagnoses
Driver's License	Demographics	Demographics
Eruption of skin (disorder)	Diagnoses	Diagnoses
Fibromyalgia (disorder)	Diagnoses	Diagnoses
Finding of vomiting (finding)	Diagnoses	Diagnoses
Full-time employment (finding)	Demographics,Social Determinants of Health	Demographics,Social Determinants of Health
Hydrochlorothiazide 25 MG Oral Tablet	Medications	Medications
IPV	Other	Other
Ischemic heart disease (disorder)	Diagnoses	Diagnoses
Isoflurane 999 MG/ML Inhalant Solution	Medications	Medications
Magnetic resonance imaging for measurement of brain volume (procedure)	Other	Other
MCHC [Mass/volume] by Automated count	Other	Other
Monocytes [#/volume] in Blood by Automated count	Other	Other
Monocytes/100 leukocytes in Blood by Automated count	Other	Other
Neutrophils [#/volume] in Blood by Automated count	Other	Other
Nitrite [Presence] in Urine by Test strip	Other	Other
Non-small cell carcinoma of lung, TNM stage 1 (disorder)	Diagnoses	Diagnoses
Not Hispanic or Latino (Ethnicity)	Demographics,Social Determinants of Health	Demographics,Social Determinants of Health
Notification of treatment plan (procedure)	Other	Other
Osteoarthritis of knee	Diagnoses	Diagnoses
Oxygen saturation in Arterial blood	Other	Other
Paclitaxel 100 MG Injection	Medications	Medications
Partial resection of colon	Diagnoses	Diagnoses
pH of Urine by Test strip	Other	Other
pH of Venous blood	Other	Other
Physical therapy procedure (regime/therapy)	Other	Other
Platelets [#/volume] in Blood by Automated count	Other	Other
Pneumococcal conjugate PCV 13	Medications	Medications
Pneumococcal polysaccharide vaccine, 23 valent	Medications	Medications
Polyp size greatest dimension by CAP cancer protocols	Diagnoses	Diagnoses
Polysomnography analyzer (physical object)	Other	Other
Postoperative procedure education (procedure)	Other	Other
Preparation of patient for procedure (regime/therapy)	Other	Other
Professional / ancillary services care (regime/therapy)	Other	Other
Protein [Mass/volume] in Urine by Test strip	Other	Other
Prothrombin time (PT)	Other	Other
Pulmonary catheterization with Swan-Ganz catheter (procedure)	Other	Other
Pulmonary emphysema (disorder)	Diagnoses	Diagnoses
Received higher education (finding)	Demographics,Social Determinants of Health	Demographics,Social Determinants of Health
Rhinoconjunctivitis (disorder)	Diagnoses	Diagnoses
Scheduling (procedure)	Other	Other
Sinusitis (disorder)	Diagnoses	Diagnoses
Smoking cessation education	Social Determinants of Health,Other	Social Determinants of Health,Other
Sputum examination (procedure)	Other	Other
Sputum finding (finding)	Other	Other
State (address)	Demographics	Demographics
Streptococcus pneumoniae group B antigen test	Other	Other
Systolic Blood Pressure	Other	Other
Throat culture (procedure)	Other	Other
Thyrotropin [Units/volume] in Serum or Plasma	Other	Other
Trinessa 28 Day Pack	Medications	Medications
Upper arm X-ray	Other	Other
Urea Nitrogen	Other	Other
Urgent care clinic (procedure)	Other	Other
US Guidance for biopsy of Prostate	Other	Other
Viral sinusitis (disorder)	Diagnoses	Diagnoses
Vitamin B 12 5 MG/ML Injectable Solution	Medications	Medications
Walking exercise test (procedure)	Other	Other
24 HR metoprolol succinate 100 MG Extended Release Oral Tablet	Medications	Medications
25 ML protamine sulfate (USP) 10 MG/ML Injection	Medications	Medications
60 ACTUAT Fluticasone propionate 0.25 MG/ACTUAT / salmeterol 0.05 MG/ACTUAT Dry Powder Inhaler	Medications	Medications
Acetaminophen 325 MG Oral Tablet [Tylenol]	Medications	Medications
Acute myeloid leukemia, disease (disorder)	Diagnoses	Diagnoses
Acute non-ST segment elevation myocardial infarction (disorder)	Diagnoses	Diagnoses
Acute respiratory failure (disorder)	Diagnoses	Diagnoses
Admission to surgical department	Other	Other
Assessment of health and social care needs (procedure)	Social Determinants of Health	Social Determinants of Health
Asthma	Diagnoses	Diagnoses
Atorvastatin 40 MG Oral Tablet	Medications	Medications
Birth date	Demographics	Demographics
Budesonide 0.25 MG/ML Inhalation Suspension	Medications	Medications
Cannulation (procedure)	Other	Other
Carcinoma in situ of prostate (disorder)	Diagnoses	Diagnoses
Childhood asthma	Diagnoses	Diagnoses
Cisplatin 50 MG Injection	Medications	Medications
City	Demographics	Demographics
Combined chemotherapy and radiation therapy (procedure)	Other	Other
Concussion with loss of consciousness	Diagnoses	Diagnoses
Deep breathing and coughing exercises	Other	Other
Diabetes	Diagnoses	Diagnoses
Discharge to ward (procedure)	Other	Other
Documentation procedure (procedure)	Other	Other
Drug addiction counseling	Behavioral Health	Behavioral Health
Encounter for check up (procedure)	Other	Other
Encounter for problem	Other	Other
Encounter for symptom (procedure)	Other	Other
Encounter Inpatient	Other	Other
Epidural anesthesia	Other	Other
Etonogestrel 68 MG Drug Implant	Medications	Medications
Evaluation + Plan note	Other	Other
Exercise Therapy	Other	Other
Febrile neutropenia (disorder)	Diagnoses	Diagnoses
Generalized anxiety disorder 7 item (GAD-7)	Diagnoses	Diagnoses
Hep B, adult	Diagnoses	Diagnoses
History and physical examination (procedure)	Other	Other
History of myocardial infarction (situation)	Diagnoses	Diagnoses
Induced cardioplegia (procedure)	Diagnoses	Diagnoses
Inhaled steroid therapy	Medications	Medications
Iron panel - Serum or Plasma	Diagnoses	Diagnoses
Loratadine 5 MG Chewable Tablet	Medications	Medications
Medical Record Number	Demographics	Demographics
Naproxen sodium 220 MG Oral Tablet	Medications	Medications
Never smoked tobacco (finding)	Other	Other
Non-small cell lung cancer (disorder)	Diagnoses	Diagnoses
Passport Number	Demographics	Demographics
Patient discharge (procedure)	Other	Other
Patient transfer to intensive care unit (procedure)	Other	Other
Perennial allergic rhinitis with seasonal variation	Diagnoses	Diagnoses
Prediabetes	Diagnoses	Diagnoses
Protein [Mass/volume] in Serum or Plasma	Other	Other
Psychological assessment	Behavioral Health	Behavioral Health
Recurrent rectal polyp	Diagnoses	Diagnoses
Removal of aortic cross clamp (procedure)	Other	Other
Removal of subcutaneous contraceptive	Sexual and Reproductive Health	Sexual and Reproductive Health
Replacement of contraceptive intrauterine device	Sexual and Reproductive Health	Sexual and Reproductive Health
Respiratory rate	Other	Other
Review of systems (procedure)	Other	Other
Sodium (laboratory test)	Other	Other
Sprain of ankle	Diagnoses	Diagnoses
Tobacco smoking status	Other	Other
Urea nitrogen [Mass/volume] in Serum or Plasma	Other	Other
Urinalysis macro (dipstick) panel - Urine	Other	Other
Wheat (allergy substance)	Other	Other
Wheal (finding)	Other	Other
Wheezing (finding)	Other	Other
Admission to ward (procedure)	Other	Other
Alkaline phosphatase [Enzymatic activity/volume] in Serum or Plasma	Other	Other
Appliance for sleep apnea (physical object)	Other	Other
Blood typing, RH typing	Other	Other
Bone immobilization	Other	Other
Brief general examination (procedure)	Other	Other
Carbon dioxide [Partial pressure] in Venous blood	Other	Other
Cardiopulmonary bypass operation (procedure)	Other	Other
Care regimes assessment (procedure)	Other	Other
Clopidogrel 75 MG Oral Tablet	Medications	Medications
Color of Urine	Other	Other
Complete blood count (hemogram) panel - blood by automated count	Other	Other
Consultation for treatment	Other	Other
Country (address)	Demographics	Demographics
Creatine kinase [Enzymatic activity/volume] in Serum or Plasma	Other	Other
Diastolic Blood Pressure	Other	Other
Discharge from hospital (procedure)	Other	Other
Discharge from skilled nursing facility (procedure)	Other	Other
Echocardiography (procedure)	Other	Other
Electrocardiographic procedure (procedure)	Other	Other
Emergency Encounter	Other	Other
Emergency hospital admission for asthma	Other	Other
Emergency room admission (procedure)	Other	Other
Encounter for 'check-up'	Other	Other
Encounter for problem (procedure)	Other	Other
Eosinophils [#/volume] in Blood by Automated count	Other	Other
Erythrocyte distribution width [Entitic volume] by Automated count	Other	Other
Ferritin [Mass/volume] in Serum or Plasma	Other	Other
Ferrous sulfate 325 MG Oral Tablet	Medications	Medications
Heart rate	Other	Other
History and physical note	Other	Other
Hospital admission for isolation (procedure)	Other	Other
Ibuprofen 100 MG Oral Tablet	Medications	Medications
Initial patient assessment (procedure)	Other	Other
Intubation	Other	Other
Ketones [Presence] in Urine by Test strip	Other	Other
Leukocyte esterase [Presence] in Urine by Test strip	Other	Other
Localized, primary osteoarthritis of the hand	Diagnoses	Diagnoses
Malignant tumor of colon	Diagnoses	Diagnoses
Manual wheelchair (physical object)	Disabilities	Disabilities
MCH [Entitic mass] by Automated count	Diagnoses	Diagnoses
MCV [Entitic volume] by Automated count	Diagnoses	Diagnoses
Measurement of respiratory function (procedure)	Diagnoses	Diagnoses
Meperidine Hydrochloride 50 MG Oral Tablet	Medications	Medications
Microalbuminuria due to type 2 diabetes mellitus (disorder)	Diagnoses	Diagnoses
Midazolam 1 MG/ML Injectable Solution	Medications	Medications
Muscle pain (finding)	Diagnoses	Diagnoses
NDA020800 0.3 ML Epinephrine 1 MG/ML Auto-Injector	Medications	Medications
NDA021457 200 ACTUAT albuterol 0.09 MG/ACTUAT Metered Dose Inhaler [ProAir]	Medications	Medications
Neuropathy due to type 2 diabetes mellitus (disorder)	Diagnoses	Diagnoses
Nitrofurantoin 5 MG/ML Oral Suspension	Medications	Medications
Nitroglycerin 0.4 MG/ACTUAT Mucosal Spray	Medications	Medications
Obstetric emergency hospital admission	Sexual and Reproductive Health	Sexual and Reproductive Health
Obstructive sleep apnea syndrome (disorder)	Diagnoses	Diagnoses
Occupational therapy (regime/therapy)	Disabilities	Disabilities
Operative status	Diagnoses	Diagnoses
Otitis media	Diagnoses	Diagnoses
Oxygen [Partial pressure] in Arterial blood	Diagnoses	Diagnoses
Pelvis x-ray	Diagnoses	Diagnoses
pH of Arterial blood	Diagnoses	Diagnoses
Phenazopyridine hydrochloride 100 MG Oral Tablet	Medications	Medications
Physical examination	Diagnoses	Diagnoses
Platelet distribution width [Entitic volume] in Blood by Automated count	Diagnoses	Diagnoses
Platelet mean volume [Entitic volume] in Blood by Automated count	Diagnoses	Diagnoses
Postnatal visit	Sexual and Reproductive Health	Sexual and Reproductive Health
Pre-surgery testing (procedure)	Diagnoses	Diagnoses
Prenatal visit	Sexual and Reproductive Health	Sexual and Reproductive Health
Procalcitonin [Mass/volume] in Serum or Plasma	Diagnoses	Diagnoses
Protein [Presence] in Urine by Test strip	Diagnoses	Diagnoses
Proteinuria due to type 2 diabetes mellitus (disorder)	Diagnoses	Diagnoses
PT panel - Platelet poor plasma by Coagulation assay	Diagnoses	Diagnoses
Respiratory distress (finding)	Diagnoses	Diagnoses
Rocuronium bromide 10 MG/ML Injectable Solution	Medications	Medications
Simvastatin 10 MG Oral Tablet	Medications	Medications
Sleep disorder (disorder)	Diagnoses	Diagnoses
Sodium [Moles/volume] in Serum or Plasma	Diagnoses	Diagnoses
Specific gravity of Urine by Test strip	Diagnoses	Diagnoses
Suspected lung cancer (situation)	Diagnoses	Diagnoses
Total Cholesterol	Diagnoses	Diagnoses
Tramadol hydrochloride 50 MG Oral Tablet	Medications	Medications
Troponin I.cardiac panel - Serum or Plasma by High sensitivity method	Diagnoses	Diagnoses
Albuterol 0.83 MG/ML Inhalation Solution	Diagnoses,Medications	Medications
Alcoholism	Behavioral Health,Diagnoses	Diagnoses
Assessment of substance use (procedure)	Behavioral Health,Diagnoses	Behavioral Health,Other
Behavior to prevent infection	Behavioral Health	Behavioral Health,Infectious Diseases
Blighted ovum	Diagnoses,Sexual and Reproductive Health	Sexual and Reproductive Health
Cause of Death [US Standard Certificate of Death]	Diagnoses	Diagnoses,Violence
Counseling about alcohol consumption	Behavioral Health,Diagnoses	Behavioral Health
Death in hospital (event)	Diagnoses	Diagnoses,Violence
Depression screening (procedure)	Behavioral Health,Diagnoses	Behavioral Health,Diagnoses,Sexual and Reproductive Health,Violence
Drug addiction therapy	Behavioral Health,Diagnoses	Behavioral Health
Drug rehabilitation and detoxification	Behavioral Health,Diagnoses	Behavioral Health
English (what is your communication language?)	Demographics,Social Determinants of Health	Social Determinants of Health
Errin 28 Day Pack	Diagnoses,Sexual and Reproductive Health	Medications,Sexual and Reproductive Health
Gonorrhea infection test	Diagnoses,Infectious Diseases	Infectious Diseases,Sexual and Reproductive Health,Violence
Hep A, adult	Diagnoses,Infectious Diseases	Infectious Diseases
Ibuprofen 200 MG Oral Tablet	Medications	Medications,Sexual and Reproductive Health
Impacted molars	Diagnoses	Diagnoses,Other
Insertion of intrauterine contraceptive device	Sexual and Reproductive Health	Diagnoses,Medications,Sexual and Reproductive Health
Insertion of subcutaneous contraceptive	Sexual and Reproductive Health	Diagnoses,Medications,Sexual and Reproductive Health
Low Density Lipoprotein Cholesterol	Other	Social Determinants of Health,Other
Meningococcal MCV4P	Other	Diagnoses,Social Determinants of Health,Other
Only received primary school education (finding)	Social Determinants of Health	Demographics,Social Determinants of Health
Osteoporosis (disorder)	Diagnoses	Diagnoses,Social Determinants of Health
Postal code	Demographics	Demographics,Social Determinants of Health
Refugee (person)	Social Determinants of Health	Demographics,Social Determinants of Health
SARS-COV-2 (COVID-19) vaccine, mRNA, spike protein, LNP, preservative free, 30 mcg/0.3mL dose	Infectious Diseases,Other	Disabilities,Social Determinants of Health,Other
Screening for occult blood in feces (procedure)	Other	Diagnoses,Other
Severe anxiety (panic) (finding)	Behavioral Health,Diagnoses	Diagnoses
Shellfish (allergy substance)	Diagnoses,Other	Diagnoses
Social isolation (finding)	Behavioral Health	Behavioral Health,Diagnoses,Social Determinants of Health
Stress is when someone feels tense, nervous, anxious or can't sleep at night because their mind is troubled. How stressed are you?	Behavioral Health	Behavioral Health,Diagnoses
Transfusion of packed red blood cells (procedure)	Medications,Other	Other
Urine screening for glucose	Other	Diagnoses,Other
Abnormal findings diagnostic imaging heart+coronary circulat (finding)	Diagnoses	Diagnoses,Other
Acute viral pharyngitis (disorder)	Diagnoses,Infectious Diseases	Diagnoses
Administration of anesthesia for procedure (procedure)	Other	Medications,Other
Allergy education	Social Determinants of Health,Other	Other
Body mass index 30+ - obesity (finding)	Diagnoses,Disabilities	Diagnoses
Childbirth	Demographics,Diagnoses,Social Determinants of Health	Diagnoses
Chronic intractable migraine without aura	Diagnoses,Disabilities	Diagnoses
Chronic low back pain (finding)	Diagnoses,Disabilities	Diagnoses
Chronic obstructive bronchitis (disorder)	Diagnoses,Disabilities	Diagnoses
Coronary angiography (procedure)	Diagnoses,Other	Other
Diagnostic fiberoptic bronchoscopy (procedure)	Diagnoses,Other	Other
Drug Abuse Screening Test-10 [DAST-10]	Behavioral Health,Diagnoses,Social Determinants of Health	Social Determinants of Health,Other
Ex-smoker (finding)	Demographics,Social Determinants of Health	Demographics
Fall risk total [Morse Fall Scale]	Diagnoses,Social Determinants of Health	Social Determinants of Health
Has a criminal record (finding)	Demographics,Social Determinants of Health	Demographics
Head Occipital-frontal circumference Percentile	Diagnoses,Other	Other
High school diploma or GED	Demographics,Social Determinants of Health	Demographics
Hospice care (regime/therapy)	Diagnoses,Infectious Diseases,Other	Other
Hospital admission (procedure)	Behavioral Health,Diagnoses,Infectious Diseases,Violence	Diagnoses
Human immunodeficiency virus antigen test	Diagnoses,Infectious Diseases,Sexual and Reproductive Health	Infectious Diseases
Hypertension	Diagnoses,Medications	Diagnoses
Hypoxemia (disorder)	Diagnoses,Infectious Diseases	Diagnoses
Influenza virus A RNA [Presence] in Respiratory specimen by NAA with probe detection	Diagnoses,Infectious Diseases	Diagnoses
Jolivette 28 Day Pack	Medications,Sexual and Reproductive Health	Medications
Laceration of foot	Diagnoses,Violence	Diagnoses
Laceration of thigh	Diagnoses,Violence	Diagnoses
Levora 0.15/30 28 Day Pack	Medications,Sexual and Reproductive Health	Medications
Limited social contact (finding)	Behavioral Health,Social Determinants of Health	Behavioral Health
M (marital status)	Demographics,Social Determinants of Health	Demographics
Metoprolol tartrate 25 MG Oral Tablet	Diagnoses,Medications	Medications
Miscarriage in first trimester	Diagnoses,Sexual and Reproductive Health	Diagnoses
Natazia 28 Day Pack	Medications,Sexual and Reproductive Health	Medications
Neoplasm of prostate	Diagnoses,Sexual and Reproductive Health	Diagnoses
Neutrophils/100 leukocytes in Blood by Automated count	Infectious Diseases,Other	Other
Normal pregnancy	Diagnoses,Sexual and Reproductive Health	Diagnoses
Oral temperature	Infectious Diseases,Other	Other
Outpatient procedure	Diagnoses,Other	Other
Oxygen [Partial pressure] in Venous blood	Diagnoses,Other	Other
Oxygen/Inspired gas setting [Volume Fraction] Ventilator	Diagnoses,Other	Other
Parainfluenza virus 1 RNA [Presence] in Respiratory specimen by NAA with probe detection	Diagnoses,Infectious Diseases	Diagnoses
Parainfluenza virus 2 RNA [Presence] in Respiratory specimen by NAA with probe detection	Diagnoses,Infectious Diseases	Diagnoses
Pathological fracture due to osteoporosis (disorder)	Diagnoses,Genetics	Diagnoses
Peripheral blood smear interpretation	Diagnoses,Other	Other
Physical activity target light exercise	Social Determinants of Health,Other	Other
Polyp of colon	Diagnoses,Genetics	Diagnoses
Potassium [Moles/volume] in Serum or Plasma	Medications,Other	Other
Prasugrel 10 MG Oral Tablet	Diagnoses,Medications	Medications
Recommendation to limit sexual activity	Diagnoses,Disabilities,Sexual and Reproductive Health	Sexual and Reproductive Health
Removal of endotracheal tube (procedure)	Diagnoses,Other	Other
Respiratory apnea monitoring system (physical object)	Diagnoses,Other	Other
Sleep apnea assessment (procedure)	Diagnoses,Other	Other
Spanish (what is your communication language?)	Demographics,Social Determinants of Health	Demographics
Stair-climbing test (procedure)	Disabilities,Other	Other
Suspected COVID-19	Diagnoses,Infectious Diseases	Diagnoses
Terfenadine 60 MG Oral Tablet	Diagnoses,Medications	Medications
Triglycerides (laboratory test)	Genetics,Other	Other
U.S. standard certificate of death - 2003 revision	Demographics,Other	Other
Zoster	Infectious Diseases	Diagnoses,Infectious Diseases
0.25 ML Leuprolide Acetate 30 MG/ML Prefilled Syringe	Medications	Behavioral Health,Medications,Genetics,Sexual and Reproductive Health
0.4 ML Enoxaparin sodium 100 MG/ML Prefilled Syringe	Medications	Diagnoses,Medications
1 ML DOCEtaxel 20 MG/ML Injection	Medications	Diagnoses,Medications
1 ML heparin sodium, porcine 5000 UNT/ML Injection	Medications	Diagnoses,Medications
120 ACTUAT fluticasone propionate 0.044 MG/ACTUAT Metered Dose Inhaler [Flovent]	Medications	Diagnoses,Medications
120 ACTUAT mometasone furoate 0.2 MG/ACTUAT Metered Dose Inhaler [Asmanex]	Medications	Diagnoses,Medications
2 ML Ondansetron 2 MG/ML Injection	Medications	Diagnoses,Medications
Acetaminophen 160 MG Chewable Tablet	Medications	Diagnoses,Medications
Acetaminophen 21.7 MG/ML / Dextromethorphan Hydrobromide 1 MG/ML / doxylamine succinate 0.417 MG/ML Oral Solution	Medications	Diagnoses,Medications
Acetaminophen 325 MG / Oxycodone Hydrochloride 10 MG Oral Tablet [Percocet]	Medications	Diagnoses,Medications
Acetaminophen 325 MG Oral Tablet	Medications	Diagnoses,Medications
Acute bacterial sinusitis (disorder)	Diagnoses,Infectious Diseases	Diagnoses,Infectious Diseases
Acute bronchitis (disorder)	Diagnoses,Infectious Diseases	Diagnoses,Infectious Diseases
Alpha-fetoprotein test	Other	Demographics,Other
Amoxicillin 500 MG Oral Tablet	Medications	Diagnoses,Medications,Infectious Diseases
Basic Metabolic 2000 Panel	Other	Genetics,Other
Bee venom (allergy substance)	Diagnoses	Diagnoses,Genetics,Other
Bilateral tubal ligation	Sexual and Reproductive Health	Demographics,Sexual and Reproductive Health
Child attention deficit disorder	Behavioral Health,Diagnoses	Behavioral Health,Diagnoses,Other
Chlamydia antigen test	Sexual and Reproductive Health,Other	Infectious Diseases,Sexual and Reproductive Health
Chronic kidney disease stage 3 (disorder)	Diagnoses	Demographics,Diagnoses
Chronic pain	Diagnoses	Behavioral Health,Diagnoses,Disabilities,Other
COVID-19	Diagnoses,Infectious Diseases	Diagnoses
Diabetic renal disease (disorder)	Diagnoses	Diagnoses,Other
Drug detoxification	Behavioral Health,Other	Behavioral Health,Diagnoses
Housing unsatisfactory (finding)	Demographics,Social Determinants of Health	Behavioral Health,Demographics,Other
Initial Psychiatric Interview with mental status evaluation	Other	Behavioral Health,Other
Insulin human, isophane 70 UNT/ML / Regular Insulin, Human 30 UNT/ML Injectable Suspension [Humulin]	Medications	Diagnoses,Medications
Lifestyle education regarding hypertension	Other	Behavioral Health,Other
Measurement of varicella-zoster virus antibody	Diagnoses,Infectious Diseases	Infectious Diseases
MMR	Medications,Infectious Diseases	Infectious Diseases
Nasal sinus endoscopy (procedure)	Diagnoses,Medications	Diagnoses
Not in labor force (finding)	Sexual and Reproductive Health,Social Determinants of Health	Social Determinants of Health
Parainfluenza virus 3 RNA [Presence] in Respiratory specimen by NAA with probe detection	Diagnoses,Infectious Diseases	Infectious Diseases
PHQ-9 quick depression assessment panel [Reported.PHQ]	Behavioral Health,Diagnoses	Behavioral Health
Physical examination of mother	Diagnoses,Sexual and Reproductive Health	Diagnoses
Physical findings of prostate	Diagnoses,Sexual and Reproductive Health	Sexual and Reproductive Health
Prenatal initial visit	Diagnoses,Sexual and Reproductive Health	Sexual and Reproductive Health
Respiratory pathogens DNA and RNA panel - Respiratory specimen by NAA with probe detection	Diagnoses,Infectious Diseases	Infectious Diseases
Respiratory syncytial virus RNA [Presence] in Respiratory specimen by NAA with probe detection	Diagnoses,Infectious Diseases	Infectious Diseases
Rhinovirus RNA [Presence] in Respiratory specimen by NAA with probe detection	Diagnoses,Infectious Diseases	Infectious Diseases
Rotavirus, monovalent	Medications,Infectious Diseases	Infectious Diseases
SARS-COV-2 (COVID-19) vaccine, mRNA, spike protein, LNP, preservative free, 100 mcg/0.5mL dose	Medications,Infectious Diseases	Infectious Diseases
SARS-CoV-2 RNA Pnl Resp NAA+probe	Diagnoses,Infectious Diseases	Infectious Diseases
Screening for domestic abuse (procedure)	Behavioral Health,Diagnoses,Sexual and Reproductive Health,Social Determinants of Health,Violence	Violence
Served in armed forces (finding)	Demographics,Social Determinants of Health	Demographics
Sleep apnea monitoring with alarm (regime/therapy)	Diagnoses,Medications	Diagnoses
Social-history	Demographics,Social Determinants of Health	Demographics
Syphilis infection test	Diagnoses,Infectious Diseases	Infectious Diseases
Administration of vaccine to produce active immunity (procedure)	Medications	Infectious diseases
Admission to hospice (procedure)	Diagnoses	Other
Admission to orthopedic department	Diagnoses	Other
Admission to skilled nursing facility (procedure)	Diagnoses	Other
Alanine aminotransferase [Enzymatic activity/volume] in Serum or Plasma	Diagnoses	Other
Albumin [Mass/volume] in Serum or Plasma	Diagnoses	Other
Alcohol-free diet	Other	Social determinants of health
Animal dander (allergy substance)	Diagnoses	Other
Antenatal education	Other	Sexual and reproductive health
Antenatal RhD antibody screening	Diagnoses	Sexual and reproductive health
Antenatal risk assessment	Diagnoses,Social determinants of health	Sexual and reproductive health
Appearance of Urine	Diagnoses	Other
Asthma follow-up	Diagnoses	Other
Auscultation of the fetal heart	Diagnoses	Sexual and Reproductive Health
Auto Differential panel - Blood	Diagnoses	Other
Basophils/100 leukocytes in Blood by Automated count	Diagnoses	Other
Bicarbonate [Moles/volume] in Arterial blood	Diagnoses	Other
Bilirubin.total [Presence] in Urine by Test strip	Diagnoses	Other
Blood glucose meter (physical object)	Diagnoses	Other
Blood Pressure	Diagnoses	Other
Body Height	Demographics	Other
Body Weight	Demographics	Other
C reactive protein [Mass/volume] in Serum or Plasma	Diagnoses	Other
Calcium	Diagnoses	Other
Carbon dioxide, total [Moles/volume] in Venous blood	Diagnoses	Other
Chloride [Moles/volume] in Serum or Plasma	Diagnoses	Other
Clarity of Urine	Diagnoses	Other
Clavicle X-ray	Diagnoses	Violence,Other
Closed fracture of hip	Diagnoses	Violence,Other
Computed tomography of chest and abdomen	Diagnoses	Violence,Other
Coronary artery bypass grafting (procedure)	Diagnoses	Other
Creatinine [Mass/volume] in Serum or Plasma	Diagnoses	Other
Cytopathology procedure, preparation of smear, genital source	Diagnoses	Sexual and Reproductive Health,Violence
Dietary approaches to stop hypertension diet	Diagnoses,Social Determinants of Health	Behavioral Health
Digital examination of rectum	Diagnoses	Other
Digital Radiography	Diagnoses	Violence,Other
Domiciliary or rest home patient evaluation and management	Diagnoses	Social Determinants of Health
Dressing change management	Diagnoses	Other
Drug overdose	Diagnoses	Behavioral Health
DTaP	Medications	Infectious Diseases
Encounter for symptom	Demographics	Diagnoses
Episiotomy	Diagnoses	Sexual and Reproductive Health
Estimated Glomerular Filtration Rate	Diagnoses	Other
Fibrin D-dimer FEU [Mass/volume] in Platelet poor plasma	Diagnoses	Other
Follow-up encounter (procedure)	Demographics	Other
Globulin [Mass/volume] in Serum by calculation	Diagnoses	Other
Glucose [Mass/volume] in Serum or Plasma	Diagnoses	Other
Glucose [Presence] in Urine by Test strip	Diagnoses	Other
Head Occipital-frontal circumference	Diagnoses	Sexual and Reproductive Health
Hematocrit [Volume Fraction] of Blood	Diagnoses	Other
Hemoglobin / Hematocrit / Platelet count	Diagnoses	Other
Hemoglobin.gastrointestinal [Presence] in Stool by Immunologic method	Diagnoses	Other
Hep A, ped/adol, 2 dose	Medications	Infectious Diseases
Hib (PRP-OMP)	Medications	Infectious Diseases
Home nebulizer therapy	Medications	Other
Hyperlipidemia	Medications	Diagnoses
Hypertension follow-up encounter	Demographics	Diagnoses
Influenza virus A Ag [Presence] in Nasopharynx by Rapid immunoassay	Infectious Diseases	Diagnoses,Other
Influenza virus A and B Ag panel - Nasopharynx by Rapid immunoassay	Infectious Diseases	Diagnoses,Other
Influenza virus B RNA [Presence] in Respiratory specimen by NAA with probe detection	Infectious Diseases	Diagnoses,Other
Joint pain (finding)	Other	Diagnoses
Left ventricular Ejection fraction	Other	Diagnoses
Leukocytes [#/volume] in Blood by Automated count	Other	Diagnoses
Levofloxacin 500 MG Oral Tablet	Medications	Disabilities
Lisinopril 10 MG Oral Tablet	Medications	Disabilities
Losartan potassium 25 MG Oral Tablet	Medications	Disabilities
Loss of taste (finding)	Other	Diagnoses
Lymphocytes/100 leukocytes in Blood by Automated count	Diagnoses	Other
Medication Reconciliation (procedure)	Medications	Diagnoses
Metabolic syndrome X (disorder)	Genetics	Diagnoses,Social Determinants of Health,Other
Misuses drugs (finding)	Medications	Diagnoses,Social Determinants of Health
Oxygen administration by mask (procedure)	Other	Medications
Pain intensity, Enjoyment of life, General activity (PEG) 3 item pain scale	Disabilities	Social Determinants of Health,Other
Part-time or temporary work	Demographics	Social Determinants of Health
Patient encounter procedure	Other	Diagnoses
Penicillin V Potassium 500 MG Oral Tablet	Medications	Disabilities
Prostate specific Ag [Mass/volume] in Serum or Plasma	Diagnoses	Other
Prostatectomy	Other	Diagnoses
Remifentanil 2 MG Injection	Medications	Disabilities
Rubella screening	Infectious Diseases	Diagnoses
S (marital status)	Demographics	Social Determinants of Health
Screening for drug abuse (procedure)	Social Determinants of Health	Behavioral Health,Diagnoses,Other
Seasonique 91 Day Pack	Medications	Disabilities
Simvastatin 20 MG Oral Tablet	Medications	Disabilities
Social Security Number	Demographics	Other
Subcutaneous immunotherapy	Medications	Disabilities
Suture open wound	Other	Diagnoses
Vomiting symptom (finding)	Other	Diagnoses
Well child visit (procedure)	Social Determinants of Health,Other	Diagnoses
Activated clotting time (ACT) of Blood by Coagulation assay	Diagnoses	Other
Airborne precautions (procedure)	Infectious Diseases	Other
Allergic disorder follow-up assessment	Diagnoses	Other
Allergic disorder initial assessment	Diagnoses	Other
Allergy screening test	Diagnoses	Other
Antenatal blood tests	Diagnoses	Other
aPTT in Blood by Coagulation assay	Diagnoses	Other
Aspartate aminotransferase [Enzymatic activity/volume] in Serum or Plasma	Diagnoses	Other
Assessment using Morse Fall Scale (procedure)	Diagnoses	Social Determinants of Health
Basic Metabolic Panel	Diagnoses	Other
Basophils [#/volume] in Blood by Automated count	Diagnoses	Other
Bilirubin.total [Mass/volume] in Serum or Plasma	Diagnoses	Other
Body mass index (BMI) [Percentile] Per age and gender	Diagnoses	Other
Body temperature	Diagnoses	Other
Calcium [Mass/volume] in Serum or Plasma	Medications	Other
Carbon dioxide [Partial pressure] in Arterial blood	Diagnoses	Other
Carbon dioxide, total [Moles/volume] in Serum or Plasma	Diagnoses	Other
Cognitive and behavioral therapy (regime/therapy)	Behavioral Health	Other
Colonoscopy	Diagnoses	Other
Comprehensive metabolic 2000 panel - Serum or Plasma	Diagnoses	Other
Counseling	Behavioral Health	Other
Creatinine	Diagnoses	Other
Depression screening	Diagnoses,Social Determinants of Health	Other
Drugs of abuse 5 panel - Urine by Screen method	Diagnoses	Other
Eggs (edible) (allergy substance)	Diagnoses	Other
Encounter Diagnosis	Diagnoses	Other
Eosinophils/100 leukocytes in Blood by Automated count	Diagnoses	Other
Erythrocyte distribution width [Ratio] by Automated count	Diagnoses	Other
Erythrocytes [#/volume] in Blood by Automated count	Diagnoses	Other
Fatigue (finding)	Diagnoses	Other
Fetal anatomy study	Diagnoses	Other
Fetus with unknown complication	Diagnoses	Other
Fracture of clavicle	Diagnoses	Other
Fracture of forearm	Diagnoses	Other
Gas panel - Arterial blood	Diagnoses	Other
Gas panel - Venous blood	Diagnoses	Other
General examination of patient (procedure)	Diagnoses	Other
Glucose [Mass/volume] in Urine by Test strip	Diagnoses,Medications	Other
Healthcare professional (occupation)	Other	Demographics
Heartfailure Tracking Panel	Diagnoses	Other
Hemoglobin [Mass/volume] in Blood	Diagnoses	Other
Hemoglobin [Presence] in Urine by Test strip	Diagnoses,Medications	Other
Hemoglobin A1c/Hemoglobin.total in Blood	Diagnoses	Other
Hepatitis B Surface Antigen Measurement	Diagnoses	Other
Hepatitis C antibody test	Diagnoses	Other
High Density Lipoprotein Cholesterol	Diagnoses	Other
Humiliation, Afraid, Rape, and Kick questionnaire [HARK]	Behavioral Health,Infectious Diseases,Sexual and Reproductive Health,Violence	Social Determinants of Health
INR in Platelet poor plasma by Coagulation assay	Diagnoses	Other
Insertion of catheter into artery (procedure)	Diagnoses	Other
Intramuscular injection	Medications	Other
Isolation nursing in negative pressure isolation environment (regime/therapy)	Infectious Diseases	Other
Isolation of infected patient (procedure)	Diagnoses,Infectious Diseases	Other
Lactate dehydrogenase [Enzymatic activity/volume] in Serum or Plasma by Lactate to pyruvate reaction	Infectious Diseases	Other
Lymphocytes [#/volume] in Blood by Automated count	Diagnoses,Infectious Diseases	Other
Microalbumin Creatinine Ratio	Diagnoses	Other
Morse Fall Scale panel	Other	Social Determinants of Health
Physical examination following birth	Diagnoses	Other
Received certificate of high school equivalency (finding)	Social Determinants of Health	Other
Referral to cardiology service (procedure)	Diagnoses	Other
Referral to sleep apnea clinic (procedure)	Diagnoses	Other
Reports of violence in the environment (finding)	Social Determinants of Health,Violence	Other
Rest, ice, compression and elevation treatment programme	Diagnoses,Other	Medications
Screening for chromosomal aneuploidy in prenatal amniotic fluid	Genetics,Sexual and Reproductive Health	Other
Skin test for tuberculosis	Infectious Diseases	Other
Speech and language therapy regime (regime/therapy)	Diagnoses,Disabilities	Other
Standard pregnancy test	Medications,Sexual and Reproductive Health	Other
Streptococcal sore throat (disorder)	Disabilities	Diagnoses
Stress (finding)	Behavioral Health	Other
Transfusion of fresh frozen plasma (procedure)	Diagnoses	Medications
Tree nut (allergy substance)	Diagnoses	Other
Tree pollen (allergy substance)	Diagnoses	Other
Troponin I.cardiac [Mass/volume] in Serum or Plasma by High sensitivity method	Diagnoses	Other
Unhealthy alcohol drinking behavior (finding)	Behavioral Health,Social Determinants of Health,Violence	Other
Urine screening test for diabetes	Diagnoses	Other
Weight-for-length per age and sex	Demographics	Other
(Insurance) coverage	Other	Demographics
Adenovirus A+B+C+D+E DNA [Presence] in Respiratory specimen by NAA with probe detection	Other	Diagnoses,Infectious Diseases
Anticipatory guidance (procedure)	Social Determinants of Health	Other
Assessment of anxiety (procedure)	Other	Behavioral Health
Assessment using Alcohol Use Disorders Identification Test - Consumption (procedure)	Other	Behavioral Health
Bicarbonate [Moles/volume] in Venous blood	Medications	Other
Biopsy of prostate	Other	Demographics,Sexual and Reproductive Health
Body Mass Index	Other	Behavioral Health,Demographics,Diagnoses,Genetics
Camila 28 Day Pack	Medications,Sexual and Reproductive Health	Other
Cefazolin 2000 MG Injection	Medications	Infectious Diseases
Cough (finding)	Diagnoses	Other
Depression screening using Patient Health Questionnaire Nine Item score (procedure)	Other	Behavioral Health,Diagnoses
Development of individualized plan of care (procedure)	Medications	Other
Diabetic diet	Medications,Social Determinants of Health	Diagnoses,Genetics
Diarrhea symptom (finding)	Diagnoses	Infectious Diseases
Dyspnea (finding)	Diagnoses	Other
Evaluation of uterine fundal height	Other	Demographics,Sexual and Reproductive Health
Fever (finding)	Diagnoses	Infectious Diseases
Fish (allergy substance)	Diagnoses	Other
Food allergy diet	Medications	Other
Gender	Demographics	Behavioral Health,Other
Grass pollen (allergy substance)	Diagnoses	Other
Health risks education (procedure)	Sexual and Reproductive Health,Social Determinants of Health	Other
Healthcare services (qualifier value)	Social Determinants of Health	Other
Hep B, adolescent or pediatric	Diagnoses	Infectious Diseases
History of coronary artery bypass grafting (situation)	Diagnoses	Other
Homeless (finding)	Demographics,Social Determinants of Health	Other
HPV, quadrivalent	Medications	Behavioral Health,Diagnoses,Infectious Diseases,Sexual and Reproductive Health
Human metapneumovirus RNA [Presence] in Respiratory specimen by NAA with probe detection	Other	Infectious Diseases
Hypertriglyceridemia (disorder)	Diagnoses	Genetics,Other
Influenza virus B Ag [Presence] in Nasopharynx by Rapid immunoassay	Other	Infectious Diseases
Influenza, seasonal, injectable, preservative free	Medications	Other
Itching (finding)	Diagnoses	Other
Laceration of forearm	Diagnoses	Other
Lipid panel	Diagnoses	Behavioral Health
Magnesium [Mass/volume] in Serum or Plasma	Diagnoses	Medications
Median sternotomy (procedure)	Medications	Violence
Mold (organism)	Infectious Diseases	Social Determinants of Health
Movement therapy (regime/therapy)	Disabilities,Medications	Behavioral Health
Nausea (finding)	Diagnoses	Sexual and Reproductive Health
Neutropenia (disorder)	Diagnoses	Medications
Nursing care/supplementary surveillance (regime/therapy)	Medications	Disabilities
Oxygen concentrator (physical object)	Diagnoses	Disabilities
Packed red blood cells (product)	Medications	Infectious Diseases
Pain severity - 0-10 verbal numeric rating [score] - reported	Diagnoses	Disabilities
Pain severity - reported	Diagnoses	Disabilities
Part-time employment (finding)	Social Determinants of Health	Demographics
Patient encounter procedure (procedure)	Medications	Other
Phosphate [Mass/volume] in Serum or Plasma	Diagnoses	Medications
Placement of aortic cross clamp (procedure)	Medications	Diagnoses
Placing subject in prone position (procedure)	Diagnoses	Other
Plain chest x-ray (procedure)	Diagnoses	Infectious Diseases
Pneumonia (disorder)	Diagnoses	Infectious Diseases
Post anesthesia care management (procedure)	Medications	Other
Pre-discharge assessment (procedure)	Diagnoses	Other
Prescribed activity/exercise education	Behavioral Health,Medications,Social Determinants of Health	Diagnoses
Pulmonary rehabilitation (regime/therapy)	Medications	Disabilities
Recommendation to avoid exercise	Behavioral Health,Medications,Social Determinants of Health	Diagnoses
Recommendation to rest	Behavioral Health,Medications,Social Determinants of Health	Diagnoses
Rectal polypectomy	Medications	Other
Referral to cardiac surgery service (procedure)	Medications	Diagnoses
RhD passive immunization	Diagnoses,Medications	Sexual and Reproductive Health
Risk activity involvement (finding)	Demographics,Social Determinants of Health	Violence
Sertraline 100 MG Oral Tablet	Medications	Behavioral Health
Stretching exercises	Medications	Other
Td (adult) preservative free	Diagnoses	Infectious Diseases
Tdap	Diagnoses	Infectious Diseases
Ultrasound scan for fetal viability	Diagnoses	Sexual and Reproductive Health
Urinalysis complete panel - Urine	Diagnoses	Sexual and Reproductive Health
Urine culture	Diagnoses	Infectious Diseases
